# Supplementary material
Source: publisher figshare collection journal article supplement (https://sage.figshare.com/ndownloader/files/13748600)
Supplement: Supplementary file 1 [file 13748600]

Supplementary Material A

Korean Author Recognition Test (KART)

| **Korean Author Recognition Test (KART)**  아래 제시된 보기들은 사람들의 이름입니다. 이 중에는 작가들의 이름도 있고, 작가가 아닌 사람들의 이름도 있습니다. 확실하게 작가라고 생각되는 사람의 이름을 모두 골라주세요. 작가가 아닌 사람의 이름을 고를 시 감점이 있으므로 작가라고 확신하는 사람의 이름 옆에만 체크해주세요. (*작가는 책의 저자를 의미합니다.)  이름을 골랐다면 어떤 방식으로 작가라는 것을 알게 되었는지 아래에 제시된 (1), (2), (3) 중 하나를 선택해주세요. 감사합니다.^^  (1): 작가의 이름을 들어본 적은 있지만 작가의 작품을 읽은 적은 없다.  (2): 작가의 작품을 읽으려고 시도했지만 다 읽지 못했다.  (3): 작가의 작품을 1개 혹은 그 이상 읽었다.   |  | 실제 작가다 | (1) | (2) | (3) |  |  | 실제 작가다 | (1) | (2) | (3) | | --- | --- | --- | --- | --- | --- | --- | --- | --- | --- | --- | | 아부라메 시노 | □ | □ | □ | □ |  | 알베르 카뮈 | □ | □ | □ | □ | | 조정래 | □ | □ | □ | □ |  | 전애순* | □ | □ | □ | □ | | 한강 | □ | □ | □ | □ |  | 산들 | □ | □ | □ | □ | | 니노미야 카즈나리 | □ | □ | □ | □ |  | 글로리아 맥컴버 | □ | □ | □ | □ | | 호메로스 | □ | □ | □ | □ |  | 오쿠다 히데오 | □ | □ | □ | □ | | 요한 볼프강 폰 괴테 | □ | □ | □ | □ |  | 마이클 샌델 | □ | □ | □ | □ | | 이설민 | □ | □ | □ | □ |  | 하나자와 루이 | □ | □ | □ | □ | | 요나스 요나손 | □ | □ | □ | □ |  | 에쿠니 가오리 | □ | □ | □ | □ | | 헤르만 헤세 | □ | □ | □ | □ |  | 김소월 | □ | □ | □ | □ | | 김난도 | □ | □ | □ | □ |  | 웨인 필버그 | □ | □ | □ | □ | | 애덤 스미스 | □ | □ | □ | □ |  | 혜민 스님 | □ | □ | □ | □ | | 하나타와 이치로 | □ | □ | □ | □ |  | 해리 코튼허트 | □ | □ | □ | □ | | 진목 | □ | □ | □ | □ |  | 월터 도리슨 | □ | □ | □ | □ | | 칼 세이건 | □ | □ | □ | □ |  | 더크워스 글램 | □ | □ | □ | □ | | 김희설 | □ | □ | □ | □ |  | 알피노 르베유르 | □ | □ | □ | □ | | 알랭 드 보통 | □ | □ | □ | □ |  | 프란츠 카프카 | □ | □ | □ | □ | | J.R.R. 톨킨 | □ | □ | □ | □ |  | 법륜 | □ | □ | □ | □ | | 리처드 도킨스 | □ | □ | □ | □ |  | 무라카미 하루키 | □ | □ | □ | □ | |
| --- | --- | --- | --- | --- | --- | --- | --- | --- | --- | --- | --- | --- | --- | --- | --- | --- | --- | --- | --- | --- | --- | --- | --- | --- | --- | --- | --- | --- | --- | --- | --- | --- | --- | --- | --- | --- | --- | --- | --- | --- | --- | --- | --- | --- | --- | --- | --- | --- | --- | --- | --- | --- | --- | --- | --- | --- | --- | --- | --- | --- | --- | --- | --- | --- | --- | --- | --- | --- | --- | --- | --- | --- | --- | --- | --- | --- | --- | --- | --- | --- | --- | --- | --- | --- | --- | --- | --- | --- | --- | --- | --- | --- | --- | --- | --- | --- | --- | --- | --- | --- | --- | --- | --- | --- | --- | --- | --- | --- | --- | --- | --- | --- | --- | --- | --- | --- | --- | --- | --- | --- | --- | --- | --- | --- | --- | --- | --- | --- | --- | --- | --- | --- | --- | --- | --- | --- | --- | --- | --- | --- | --- | --- | --- | --- | --- | --- | --- | --- | --- | --- | --- | --- | --- | --- | --- | --- | --- | --- | --- | --- | --- | --- | --- | --- | --- | --- | --- | --- | --- | --- | --- | --- | --- | --- | --- | --- | --- | --- | --- | --- | --- | --- | --- | --- | --- | --- | --- | --- | --- | --- | --- | --- | --- | --- | --- | --- | --- | --- | --- | --- | --- | --- | --- | --- | --- | --- | --- | --- | --- |
| (1): 작가의 이름을 들어본 적은 있지만 작가의 작품을 읽은 적은 없다.  (2): 작가의 작품을 읽으려고 시도했지만 다 읽지 못했다.  (3): 작가의 작품을 1개 혹은 그 이상 읽었다.   |  | 실제 작가다 | (1) | (2) | (3) |  |  | 실제 작가다 | (1) | (2) | (3) | | --- | --- | --- | --- | --- | --- | --- | --- | --- | --- | --- | | 신경숙 | □ | □ | □ | □ |  | 에우로스 | □ | □ | □ | □ | | 스테판 허스턴 | □ | □ | □ | □ |  | 백구영* | □ | □ | □ | □ | | 스콧 알렉산더 | □ | □ | □ | □ |  | 채사장 | □ | □ | □ | □ | | 프레드릭 먼도우 | □ | □ | □ | □ |  | 박훈 | □ | □ | □ | □ | | 에드몽 드 포르탕 | □ | □ | □ | □ |  | 카니얼 휘트먼 | □ | □ | □ | □ | | 홍희라 | □ | □ | □ | □ |  | 기욤 뮈소 | □ | □ | □ | □ | | 천솔뫼 | □ | □ | □ | □ |  | 손영지 | □ | □ | □ | □ | | 김진명 | □ | □ | □ | □ |  | 백석 | □ | □ | □ | □ | | 프레아 뮐레르 | □ | □ | □ | □ |  | 신영복 | □ | □ | □ | □ | | 피터 플래거티 | □ | □ | □ | □ |  | 안나 스팅 | □ | □ | □ | □ | | 리사 우드워드 | □ | □ | □ | □ |  | 미셀 푸코 | □ | □ | □ | □ | | 김영하 | □ | □ | □ | □ |  | 이설태 | □ | □ | □ | □ | | 베르나르 베르베르 | □ | □ | □ | □ |  | 윤동주 | □ | □ | □ | □ | | 장 지글러 | □ | □ | □ | □ |  | 나태주 | □ | □ | □ | □ | | 히가시노 게이고 | □ | □ | □ | □ |  | 은서희 | □ | □ | □ | □ | | 정유정 | □ | □ | □ | □ |  | 미뉴얼 스미스 | □ | □ | □ | □ | | 설민지 | □ | □ | □ | □ |  | 히로유키 오시타 | □ | □ | □ | □ | | 제인 오스틴 | □ | □ | □ | □ |  | 어니스트 헤밍웨이 | □ | □ | □ | □ | | 권순보 | □ | □ | □ | □ |  | 장순태 | □ | □ | □ | □ | | 김미경 | □ | □ | □ | □ |  | 윤이석 | □ | □ | □ | □ | | 진소미 | □ | □ | □ | □ |  | 정희열 | □ | □ | □ | □ | | 아투로  가르시아 페레즈 | □ | □ | □ | □ |  | 더글라스 케네디 | □ | □ | □ | □ | |

*Note.* Names marked with an asterisk(*) were not used in the current experiment. ‘전이선’ and ‘백가영’ were used instead of ‘전애순’ and ‘백구영’. However, because ‘전이선’ and ‘백가영’ published books after the time when the current experiment was conducted, we changed their names into non-author names.

Supplementary Material B

Reading/Writing Time Estimates

| **Reading/Writing Time Estimates**  다음은 여러분들의 읽고 쓰는 습관을 알아보기 위한 자가진단 테스트입니다. 최대한 솔직하게 답변해주시면 감사하겠습니다.  **Ⅰ. 글을 읽는 시간 (일주일 기준)**   |  | 1시간 | 2시간 | 3시간 | 4시간 | 5시간 | 6시간 | 7시간 이상 | | --- | --- | --- | --- | --- | --- | --- | --- | | 1. 교과서 | □ | □ | □ | □ | □ | □ | □ | | 2. 학술 자료 (교과서 제외) | □ | □ | □ | □ | □ | □ | □ | | 3. 잡지 | □ | □ | □ | □ | □ | □ | □ | | 4. 신문 | □ | □ | □ | □ | □ | □ | □ | | 5. 이메일 | □ | □ | □ | □ | □ | □ | □ | | 6. 웹툰 | □ | □ | □ | □ | □ | □ | □ | | 7. 인터넷 매체 (이메일, 웹툰 제외) | □ | □ | □ | □ | □ | □ | □ | | 8. 소설 (ebook 포함) | □ | □ | □ | □ | □ | □ | □ | | 9. 비소설 (ebook 포함) | □ | □ | □ | □ | □ | □ | □ | | 10. 기타( ) | □ | □ | □ | □ | □ | □ | □ |   **Ⅱ. 글을 쓰는 시간 (일주일 기준)**   |  | 1시간 | 2시간 | 3시간 | 4시간 | 5시간 | 6시간 | 7시간 이상 | | --- | --- | --- | --- | --- | --- | --- | --- | | 1. 수업시간에 요구되는 모든 작문 숙제 | □ | □ | □ | □ | □ | □ | □ | | 2. 신문기사, 혹은 수업에서 요구되지 않는 인터넷 매체글 (이메일 제외) | □ | □ | □ | □ | □ | □ | □ | | 3. 개인적인 글 (예: 일기, 편지 등) | □ | □ | □ | □ | □ | □ | □ | | 4. 이메일 | □ | □ | □ | □ | □ | □ | □ | | 5. 수업시간에 요구되지 않는 창의적인 글쓰기 (예: 소설, 시, 희곡 등) | □ | □ | □ | □ | □ | □ | □ | | 6. 이메일을 제외한 직업 관련 문서 (메모, 레포트 등) | □ | □ | □ | □ | □ | □ | □ | | 7. 기타( ) | □ | □ | □ | □ | □ | □ | □ | |
| --- | --- | --- | --- | --- | --- | --- | --- | --- | --- | --- | --- | --- | --- | --- | --- | --- | --- | --- | --- | --- | --- | --- | --- | --- | --- | --- | --- | --- | --- | --- | --- | --- | --- | --- | --- | --- | --- | --- | --- | --- | --- | --- | --- | --- | --- | --- | --- | --- | --- | --- | --- | --- | --- | --- | --- | --- | --- | --- | --- | --- | --- | --- | --- | --- | --- | --- | --- | --- | --- | --- | --- | --- | --- | --- | --- | --- | --- | --- | --- | --- | --- | --- | --- | --- | --- | --- | --- | --- | --- | --- | --- | --- | --- | --- | --- | --- | --- | --- | --- | --- | --- | --- | --- | --- | --- | --- | --- | --- | --- | --- | --- | --- | --- | --- | --- | --- | --- | --- | --- | --- | --- | --- | --- | --- | --- | --- | --- | --- | --- | --- | --- | --- | --- | --- | --- | --- | --- | --- | --- | --- | --- | --- | --- | --- | --- | --- | --- | --- | --- | --- | --- | --- |

Supplementary Material C

Comparative Reading Habits (CRH)

| **Comparative Reading Habits**  다음은 동료 학생들과 여러분의 읽는 습관을 비교하는 문제입니다. 1~7 척도를 기준으로 해당 점수에 동그라미를 쳐주세요. 높은 점수는 동료들에 비해 문제에서 요구하는 시간이나 양 등의 크기가 크다는 것을 의미합니다. 질문에 대한 판단은 개인의 몫으로 최대한 솔직하게 답변해주시면 감사하겠습니다.   | 1. 여러분은 동료 학생들에 비해 얼마나 많이 읽는다고 생각하십니까? | 1 | 2 | 3 | 4 | 5 | 6 | 7 | | --- | --- | --- | --- | --- | --- | --- | --- | | 2. 여러분은 동료 학생들에 비해 얼마나 복잡한 글을 읽는다고 생각하십니까? | 1 | 2 | 3 | 4 | 5 | 6 | 7 | | 3. 여러분은 동료 학생들에 비해 읽는 것을 얼마나 즐기고 계십니까? | 1 | 2 | 3 | 4 | 5 | 6 | 7 | | 4. 여러분은 동료 학생들에 비해 평균적으로 얼마나 빨리 읽습니까? | 1 | 2 | 3 | 4 | 5 | 6 | 7 | | 5. 여러분은 동료 학생들에 비해 글의 내용을 얼마나 잘 이해한다고 생각하십니까? | 1 | 2 | 3 | 4 | 5 | 6 | 7 | |
| --- | --- | --- | --- | --- | --- | --- | --- | --- | --- | --- | --- | --- | --- | --- | --- | --- | --- | --- | --- | --- | --- | --- | --- | --- | --- | --- | --- | --- | --- | --- | --- | --- | --- | --- | --- | --- | --- | --- | --- | --- |

Supplementary Material D

Korean Vocabulary Task

| 1. 다음 중 단어의 뜻이 나머지 셋과 가장 거리가 먼 것은?  ➀ 온량하다 ➁ 무지하다  ➂ 수더분하다 ➃ 순하다  2. 밑줄 친 단어와 바꿔 쓰기에 가장 적절하지 않은 것은?   | 연희는 따스한 햇살이 내리쬐는 넓은 호수를 멀찍이서 바라보며 애수에 잠겨 있었다. | | --- |   ➀ 슬픔 ➁ 근심 ➂ 우수 ➃ 공상  3. 밑줄 친 단어와 의미상 대립적인 관계가 아닌 것은?   | 얼마 전 교실에서 있었던 도난 사건을 두고 친구들은 모두 설아를 힐난하였다. | | --- |   ➀ 갈채 ➁ 칭송 ➂ 지탄 ➃ 찬미  4. 다음 중 단어의 뜻이 나머지 셋과 가장 거리가 먼 것은?  ➀ 저울질하다 ➁ 비교하다  ➂ 견주다 ➃ 둘러대다  5. 다음 ( ) 안에 들어갈 말로 알맞은 말은?   | 만남과 헤어짐을 여러 번 반복하다 보면 결국 그 모든 것이 ( )는 것을 알게 될 거야. | | --- |   ➀ 미덥다 ➁ 진실하다  ➂ 부질없다 ➃ 실답다 | 6. 다음 중 단어의 뜻이 나머지 셋과 가장 거리가 먼 것은?  ➀ 미숙하다 ➁ 섬세하다  ➂ 서투르다 ➃ 어줍다  7. 밑줄 친 단어의 의미와 가장 거리가 먼 것은?   | 저 형제는 어릴 적 부모를 잃고 고아원에서 함께 자라서 그런지 유난히 형제 사이가 각별하다. | | --- |   ➀ 대수롭다 ➁ 남다르다  ➂ 특별하다 ➃ 범상하다  8. 다음 중 단어의 뜻이 나머지 셋과 가장 거리가 먼 것은?  ➀ 건설적 ➁ 적극적  ➂ 긍정적 ➃ 관능적  9. 다음 ( ) 안에 들어갈 말로 알맞은 말은?   | 현재 일어나는 일련의 사건들을 보고도 권력의 ( )에 나서는 건 큰 용기가 필요한 일이다. | | --- |   ➀ 본질 ➁ 전면 ➂ 의식 ➃ 일부  10. 다음 ( ) 안에 들어갈 말로 알맞은 말은?   | 그 사업을 진행하기 위해서는 막대한 ( )이/가 필요하다. | | --- |   ➀ 외상 ➁ 요금 ➂ 자금 ➃ 수수료 |
| --- | --- | --- | --- | --- | --- | --- | --- |
| 11. ‘50살’의 나이를 의미하는 말은?  ➀ 불혹 ➁ 약관 ➂ 이립 ➃ 지천명  12. 다음 ( ) 안에 공통적으로 들어갈 수 있는 말은?   | · 문화적 ( )  · 민족에 대한 ( )을 일깨우다.  · 자신의 직업에 대한 ( )을 갖다. | | --- |   ➀ 자긍심 ➁ 자존심  ➂ 자족감 ➃ 자신감  13. 다음 중 단어의 뜻이 나머지 셋과 가장 거리가 먼 것은?  ➀ 추상적 ➁ 감각적  ➂ 이상적 ➃ 공상적  14. 밑줄 친 단어와 바꿔 쓰기에 가장 적절하지 않은 것은?   | 자식의 일에 부모가 지나치게 개입해서는 안 된다. | | --- |   ➀ 관여 ➁ 간섭 ➂ 견제 ➃ 참견  15. 다음 ( ) 안에 공통적으로 들어갈 수 있는 말은?   | · 사람을 대하는 데 있어 ( )인 태도로 나가다.  · 그 의사는 시종일관 ( )으로 환자를 상대했다.  · 고위층의 몇몇 관료들은 ( ) 관료의식을 버려야 한다. | | --- |   ➀ 이타적 ➁ 권위적  ➂ 방관적 ➃ 적대적 | 16. 다음 ( ) 안에 들어갈 말로 알맞은 말은?   | 그 소문은 남의 말 좋아하는 ( )들 에 의해 그럴듯하게 꾸며진 이야기에 불과하다. | | --- |   ➀ 불한당 ➁ 철면피  ➂ 호사가 ➃ 외골수  17. 다음 ( ) 안에 들어갈 말로 알맞은 말은?   | 수현이는 자신에게 불리한 상황이 닥치면 ( ) 말하는 버릇이 있다. | | --- |   ➀ 에둘러 ➁ 덧없이  ➂ 참신하게 ➃ 옥죄어  18. 밑줄 친 단어와 바꿔 쓰기에 가장 알맞은 것은?   | 로미오와 줄리엣의 양 가문은 분쟁이 심하다. | | --- |   ➀ 알력 ➁ 독점 ➂ 통감 ➃ 사양  19. 다음 중 단어의 뜻이 나머지 셋과 가장 거리가 먼 것은?  ➀ 가늠하다 ➁ 헤아리다  ➂ 판단하다 ➃ 겨누다  20. 다음 중 단어의 뜻이 나머지 셋과 가장 거리가 먼 것은?  ➀ 감찰하다 ➁ 관장하다  ➂ 담당하다 ➃ 주관하다 |

| 21. 다음 중 단어의 뜻이 나머지 셋과 가장 거리가 먼 것은?  ➀ 수두룩하다 ➁ 소담하다  ➂ 숱하다 ➃ 허다하다  22. 다음 ( ) 안에 들어갈 말로 알맞은 말은?   | 다양한 생각을 받아들이지 않고 한 가지의 생각만을 ( )하는 것은 위험한 일이다. | | --- |   ➀ 고수 ➁ 일치 ➂ 후원 ➃ 동의  23. 다음 ( ) 안에 들어갈 말로 가장 적절하지 않은 것은?   | 세상을 ( )으로만 바라보는 사람은 행복이 곁에 있어도 그것이 행복인지 알지 못한다. | | --- |   ➀ 염세적 ➁ 절망적  ➂ 낙천적 ➃ 비관적  24. 다음 중 단어의 뜻이 나머지 셋과 가장 거리가 먼 것은?  ➀ 수용하다 ➁ 시인하다  ➂ 기각하다 ➃ 인정하다  25. 다음 ( ) 안에 들어갈 말로 알맞은 말은?   | 1970년대 산업화는 급속한 경제성장을 가능하게 하였다. 하지만 그 ( )에는 빈부격차의 심화나 인권유린 등의 문제가 자리 잡고 있다. | | --- |   ➀ 이면 ➁ 내면 ➂ 거죽 ➃ 실정 | 26. 밑줄 친 단어와 바꿔 쓰기에 가장 알맞은 것은?   | 판소리는 전승되는 설화에 기반을 두고 형성되었다. | | --- |   ➀ 터전 ➁ 기틀 ➂ 초석 ➃ 바탕  27. 밑줄 친 단어와 바꿔 쓰기에 가장 알맞은 것은?   | 그녀는 시장 한 구석에 자리를 잡고 넉살 좋게 주변 상인들과 떠들기 시작했다. | | --- |   ➀ 숫기 ➁ 비위 ➂ 기세 ➃ 배짱  28. 다음 중 단어의 뜻이 나머지 셋과 가장 거리가 먼 것은?  ➀ 치하 ➁ 경축 ➂ 하례 ➃ 하사  29. 다음 중 단어의 뜻이 나머지 셋과 가장 거리가 먼 것은?  ➀ 책동하다 ➁ 종용하다  ➂ 조장하다 ➃ 모략하다  30. 다음 중 단어의 뜻이 나머지 셋과 가장 거리가 먼 것은?  ➀ 방략 ➁ 계교 ➂ 참언 ➃ 술책  31. 다음 ( ) 안에 들어갈 말로 알맞은 말은?   | ( )의 조화를 부릴 줄 아는 신선의 경지에 이르다. | | --- |   ➀ 풍운 ➁ 풍광 ➂ 풍문 ➃ 풍기 |
| --- | --- | --- | --- | --- | --- | --- | --- |

| 32. 다음 ( ) 안에 공통적으로 들어갈 수 있는 말은?   | · 세밀한 관찰과 ( )을/를 거듭하다.  · 다양한 실험을 통해 우리 것에 대한 ( )을/를 계속하다.  · 뜻하는 바를 이루기 위하여 비열하고 ( )한 방법을 사용하는 것은 옳지 못하다. | | --- |   ➀ 진에 ➁ 천착 ➂ 낙착 ➃ 투도  33. 다음 중 맞춤법이 올바른 것은?  ➀ 배게 ➁ 베개 ➂ 베게 ➃ 비게  34. 다음 중 맞춤법이 올바른 것은?  ➀ 졸립다 ➁ 졸리다  ➂ 졸린다 ➃ 졸련다  35. 다음 중 맞춤법이 올바른 것은?  ➀ 널판지 ➁ 널팬지  ➂ 널빤자 ➃ 널빤지  36. 다음 중 맞춤법이 올바른 것은?  ➀ 왠일이야? ➁ 웬일이야?  ➂ 왠열이야? ➃ 웬열이야?  37. 다음 ( ) 안에 들어갈 말로 알맞은 말은?   | 서진이는 친구들에게 ( ) 장난을 많이 친다. | | --- |   ➀ 짓궂은 ➁ 짓구즌  ➂ 지꾸즌 ➃ 짖궂은 | 38. 다음 ( ) 안에 들어갈 말로 알맞은 말은?   | 아무리 나한테 관심이 없다고 해도 그걸 어떻게 ( ) 모를 수가 있어? | | --- |   ➀ 여지껏 ➁ 여태껏  ➂ 여진껏 ➃ 여태것  39. 다음 ( ) 안에 들어갈 말로 알맞은 말은?   | 탈모로 머리가 ( ). | | --- |   ➀ 벗껴지다 ➁ 뱃기지다  ➂ 벗어지다 ➃ 벗겨지다  40. 다음 ( ) 안에 들어갈 말로 알맞은 말은?   | 손의 ( )가 심하다. | | --- |   ➀ 부기 ➁ 붓기 ➂ 붇기 ➃ 부끼  41. 다음 ( ) 안에 들어갈 말로 알맞은 말은?   | ( )의 고수를 찾아가는 일은 멀고도 험난했다. | | --- |   ➀ 제야 ➁ 지야 ➂ 재하 ➃ 재야  42. 다음 ( ) 안에 들어갈 말로 알맞은 말은?   | 아이의 ( )을 보니 하루의 피로가 모두 풀리는 기분이었다. | | --- |   ➀ 베냇짓 ➁ 배내웃음  ➂ 배냇짓 ➃ 베냇웃음 |
| --- | --- | --- | --- | --- | --- | --- | --- | --- |

| 43. 다음 ( ) 안에 들어갈 말로 알맞은 말은?   | 이사 갈 집의 ( )에는 예쁜 정원이 있다. | | --- |   ➀ 뒷뜰 ➁ 뒫뜰 ➂ 뒤뜰 ➃ 뒷들  44. 다음 속담의 ( ) 안에 들어갈 말로 알맞은 말은?   | ( )은/는 메워도 사람의 욕심은 못 채운다. | | --- |   ➀ 호수 ➁ 연못 ➂ 우물 ➃ 바다  45. 다음 속담의 ( ) 안에 들어갈 말로 알맞은 말은?   | ( )도 굴러가다 서는 모가 있다. | | --- |   ➀ 수레 ➁ 달걀 ➂ 바퀴 ➃ 통나무  46. 다음 중 한자성어의 뜻이 나머지 셋과 가장 거리가 먼 것은?  ➀ 간담상조(肝膽相照)  ➁ 단금지교(斷金之交)  ➂ 읍참마속(泣斬馬謖)  ➃ 지음(知音)  47. 다음 중 ( ) 안에 들어갈 한자성어로 가장 알맞은 것은?   | 그는 이유 없이 매를 맞은 것이 분해 ( )하였다. | | --- |   ➀ 절치부심(切齒腐心)  ➁ 후안무치(厚顔無恥)  ➂ 지란지교(芝蘭之交)  ➃ 목전지계(目前之計) | 48. 다음 중 ( ) 안에 들어갈 한자성어로 가장 알맞은 것은?   | 다음 날이면 한국을 아주 떠난다는 생각에 밤새 잠을 이루지 못하고 ( )하였다. | | --- |   ➀ 전전반측(輾轉反側)  ➁ 자강불식(自强不息)  ➂ 정문일침(頂門一鍼)  ➃ 지리멸렬(支離滅裂)  49. 다음 중 단어의 뜻이 나머지 셋과 가장 거리가 먼 것은?  ➀ 절차탁마(切磋琢磨)  ➁ 형설지공(螢雪之功)  ➂ 수불석권(手不釋卷)  ➃ 견위치명(見危致命)  50. ‘동풍’을 의미하는 순우리말은?  ➀ 하늬바람 ➁ 샛바람  ➂ 마파람 ➃ 된바람  51. ‘갈피를 잡을 수 없도록 마구 지껄이는 모양’을 의미하는 순우리말은?  ➀ 코랑코랑 ➁ 콩팔칠팔  ➂ 왕배덕배 ➃ 내광쓰광  52. ‘오래 써서 끝이 닳아 떨어진 물건’을 의미하는 순우리말은?  ➀ 모지랑이 ➁ 사그랑이  ➂ 무드러기 ➃ 지스러기 |
| --- | --- | --- | --- | --- | --- | --- |

| 53. ‘빈틈없이 아주 여무진 사람’을 의미하는 순우리말은?  ➀ 당도리 ➁ 잡도리  ➂ 모도리 ➃ 약도리  54. ‘몹시 지친 상태에 있다’를 의미하는 순우리말은?  ➀ 맛문하다 ➁ 맛부리다  ➂ 맞갖다 ➃ 맛바르다  55. ‘거방지다’의 뜻으로 알맞은 것은?  ➀ 하는 짓이 점잖고 무게가 있다.  ➁ 잘난 체하거나 남을 낮추어 보듯이 행동하는 데가 있다.  ➂ 몹시 요망스럽게 보여서 불길하게 느끼거나 상서롭지 못하다.  ➃ 말이나 행동이 겸손하고 예의 바르다.  56. ‘철겹다’의 뜻으로 알맞은 것은?  ➀ 정이 넘칠 정도로 매우 다정하다.  ➁ 제철에 뒤져 맞지 아니하다.  ➂ 가엾고 불쌍하여 마음이 슬프다.  ➃ 사리를 분별할 만한 지각이 없다.  57. ‘겯고틀다’의 뜻으로 알맞은 것은?  ➀ 사상이나 의지 따위가 동요됨이 없이 확고하다.  ➁ 믿음과 의리를 저버리고 돌아서다.  ➂ 논리적으로 양립할 수 없다.  ➃ 서로지지 않으려고 버티어 겨루다. | 58. ‘드잡이’의 뜻으로 알맞은 것은?  ➀ 길을 인도해 주는 사람이나 사물  ➁ 스스로 자기 자신을 망치는 일  ➂ 늦추어진 것을 바짝 잡아 죄는 일  ➃ 서로 머리나 멱살을 움켜잡고 싸우는 짓  59. ‘두남받다’의 뜻으로 알맞은 것은?  ➀ 오는 사람을 맞아 안으로 인도하다.  ➁ 남의 행동, 태도를 본받아 따르다.  ➂ 남다른 도움이나 사랑을 받다.  ➃ 남의 의견에 반대가 되는 말로 받다.  60. ‘아근바근’의 뜻으로 알맞은 것은?  ➀ 정신이 흐릿하고 몽롱한 모양  ➁ 무엇을 이루려고 애를 쓰거나 우겨대는 모양  ➂ 한데 뒤섞이고 엉클어져 어수선한 모양  ➃ 서로 마음이 맞지 아니하여 사이가 벌어지는 모양 |
| --- | --- |
